# Supplementary material for: Habitat suitability and ecological niche profile of major malaria vectors in Cameroon
Source: Springer Nature journal article supplement (doi:10.1186/1475-2875-8-307), 2009-12-01

*An. pharoensis*\*

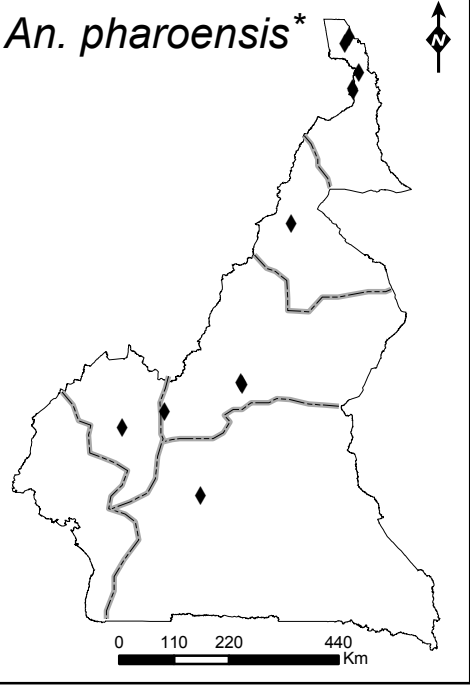

*An. hancocki*\*

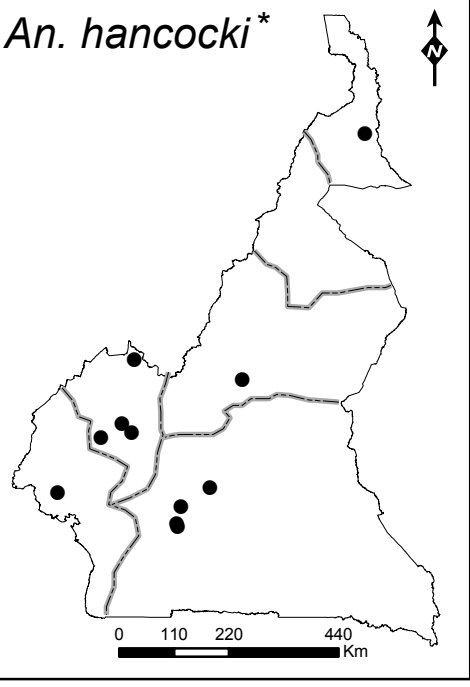

*An. ziemanni*\*

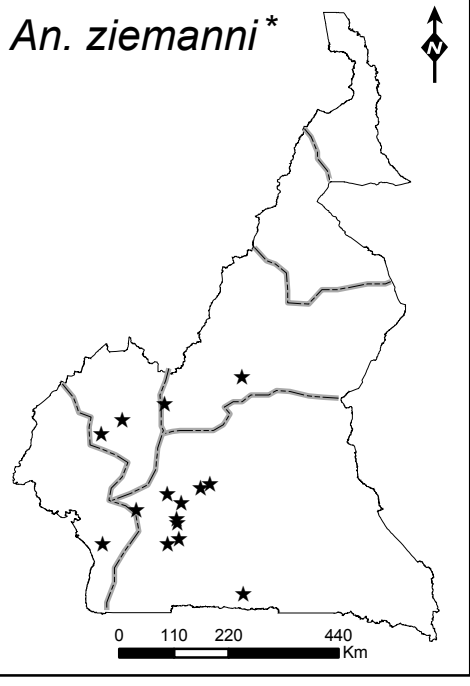

*An. paludis*\*

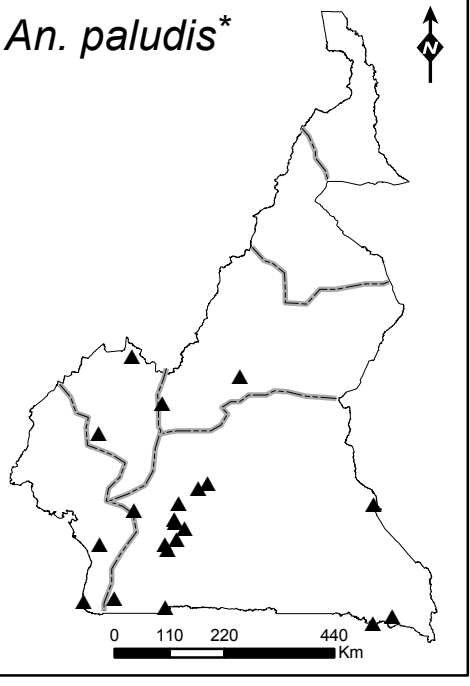

*An. coustani*\*

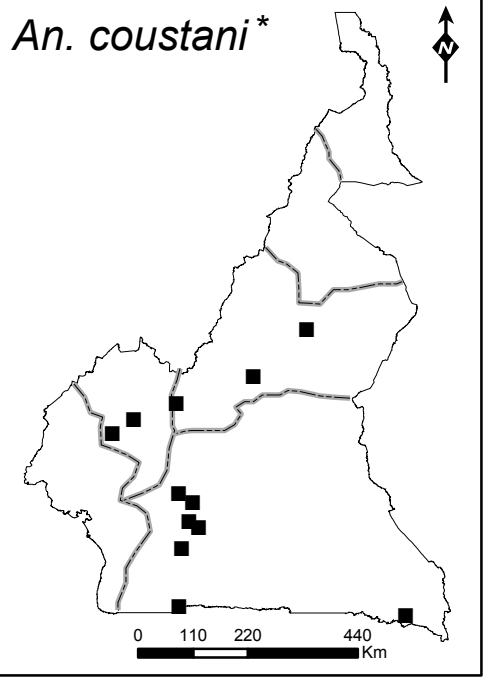

- ◆ *An. carnavaletii*\*
- ⊠ *An. implexus*
- × *An. lesoni*\*
- ⌚ *An. marshallii*\*
- ⊛ *An. melas*\*
- ⊕ *An. namibiensis*
- ⚡ *An. obscurus*
- ⊔ *An. ovengensis*\*
- ⊗ *An. pretoriensis*
- ⊕ *An. rivulorum like*\*
- ⌚ *An. rufipes*
- △ *An. smithii*
- ⊙ *An. squamosus*
- ⊖ *An. wellcomei*\*
- Bioclimatic Domains

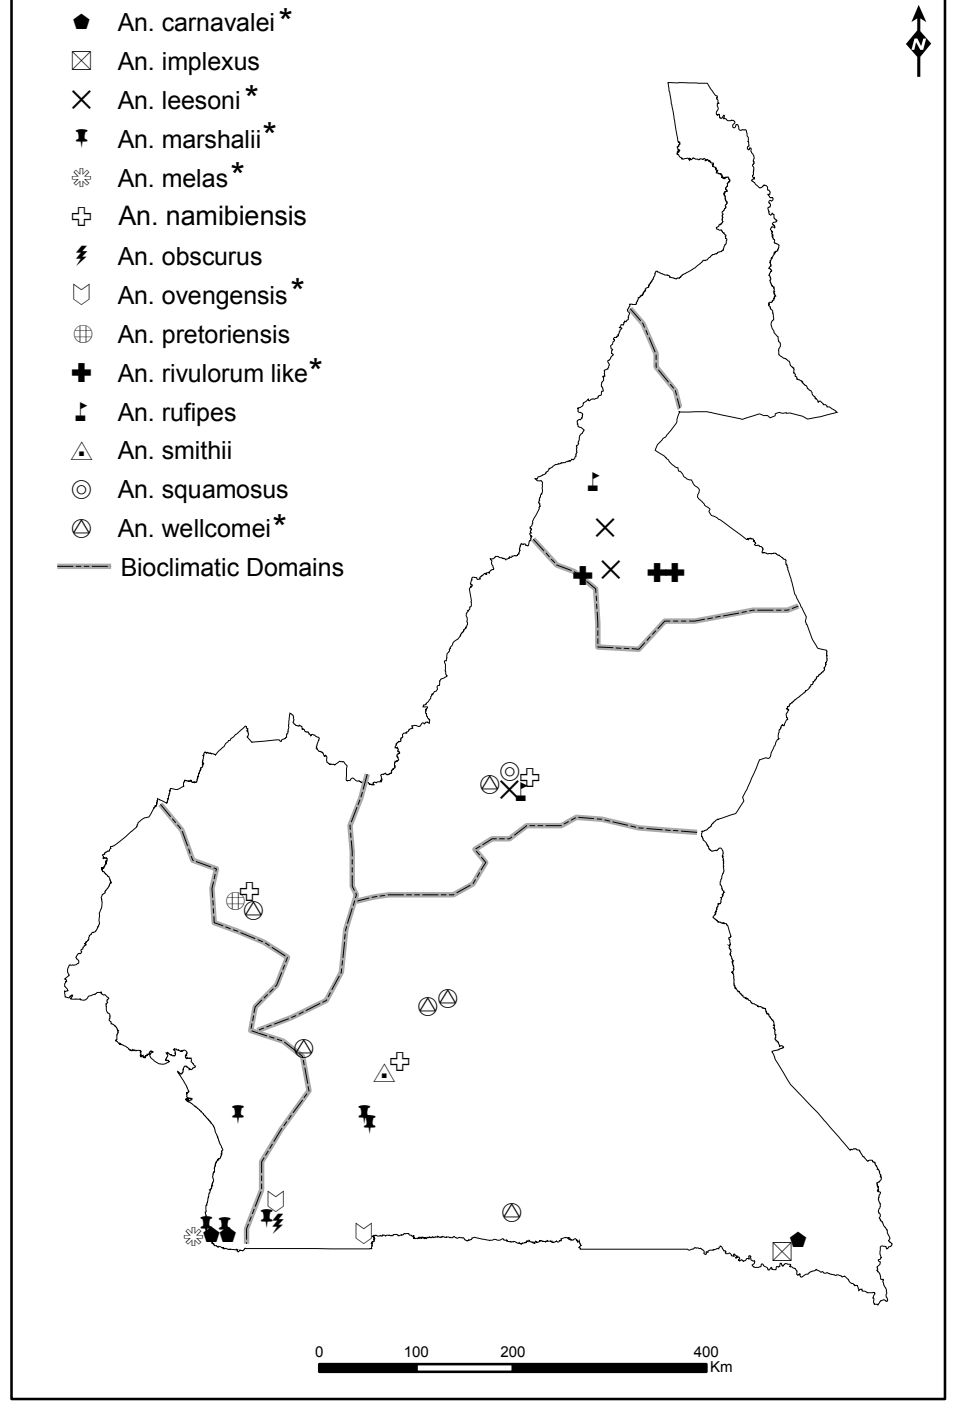

Supplement: Additional file 1 [file 1475-2875-8-307-s1.pdf]
